# Supplementary material for: Population-based study of the durability of humoral immunity after SARS-CoV-2 infection
Source: PubMed Central journal article supplement (PMC10585261; doi:10.3389/fimmu.2023.1242536), 2023-10-05
Supplement: DataSheet_1.pdf [file DataSheet_1.pdf]

## *Supplementary Material*

### **Population-based study of the durability of humoral immunity after SARS-CoV-2 infection**

#### **Supplementary Figures**

**Supplementary Figure 1: Graphical presentation of the association of age, sex, and smoking on eight antibody and avidity levels and change over time from linear mixed models.** For eight antibody and avidity levels - S RBD ELISA IgA, S RBD ELISA IgM, N NTD ELISA IgG, N CTD ELISA IgG, N NTD IgG AI, N CTD IgG AI, S ecto ELISA IgG, and S ecto ELISA IgG AI - we show the effect of age, sex, and smoking status on levels and level change. For this, a linear mixed model (LMM) was employed for each of the 8 outcome variables (i.e., levels; ln-transformed to ensure approximate normal distribution), with both time variables (timeFU1, timeFU2), age, sex, and smoking status (current, ex-, and never-smoker) as well as their interactions with the time variables as covariates. The model-based predicted effects for each of the 8 assay outcomes (re-transformed using the exponential function and thus on the original scale) are shown for several example individuals (first row: 30-, 50-, and 70-year-old individuals; second row: men and women; third row: current, ex-, and never-smokers). The shaded regions denote the corresponding 99% confidence intervals. The coefficients and their standard errors for each model are shown in Supplementary Table 4.

Supplementary Material: Population-based study of the durability of humoral immunity after SARS-CoV-2 infection

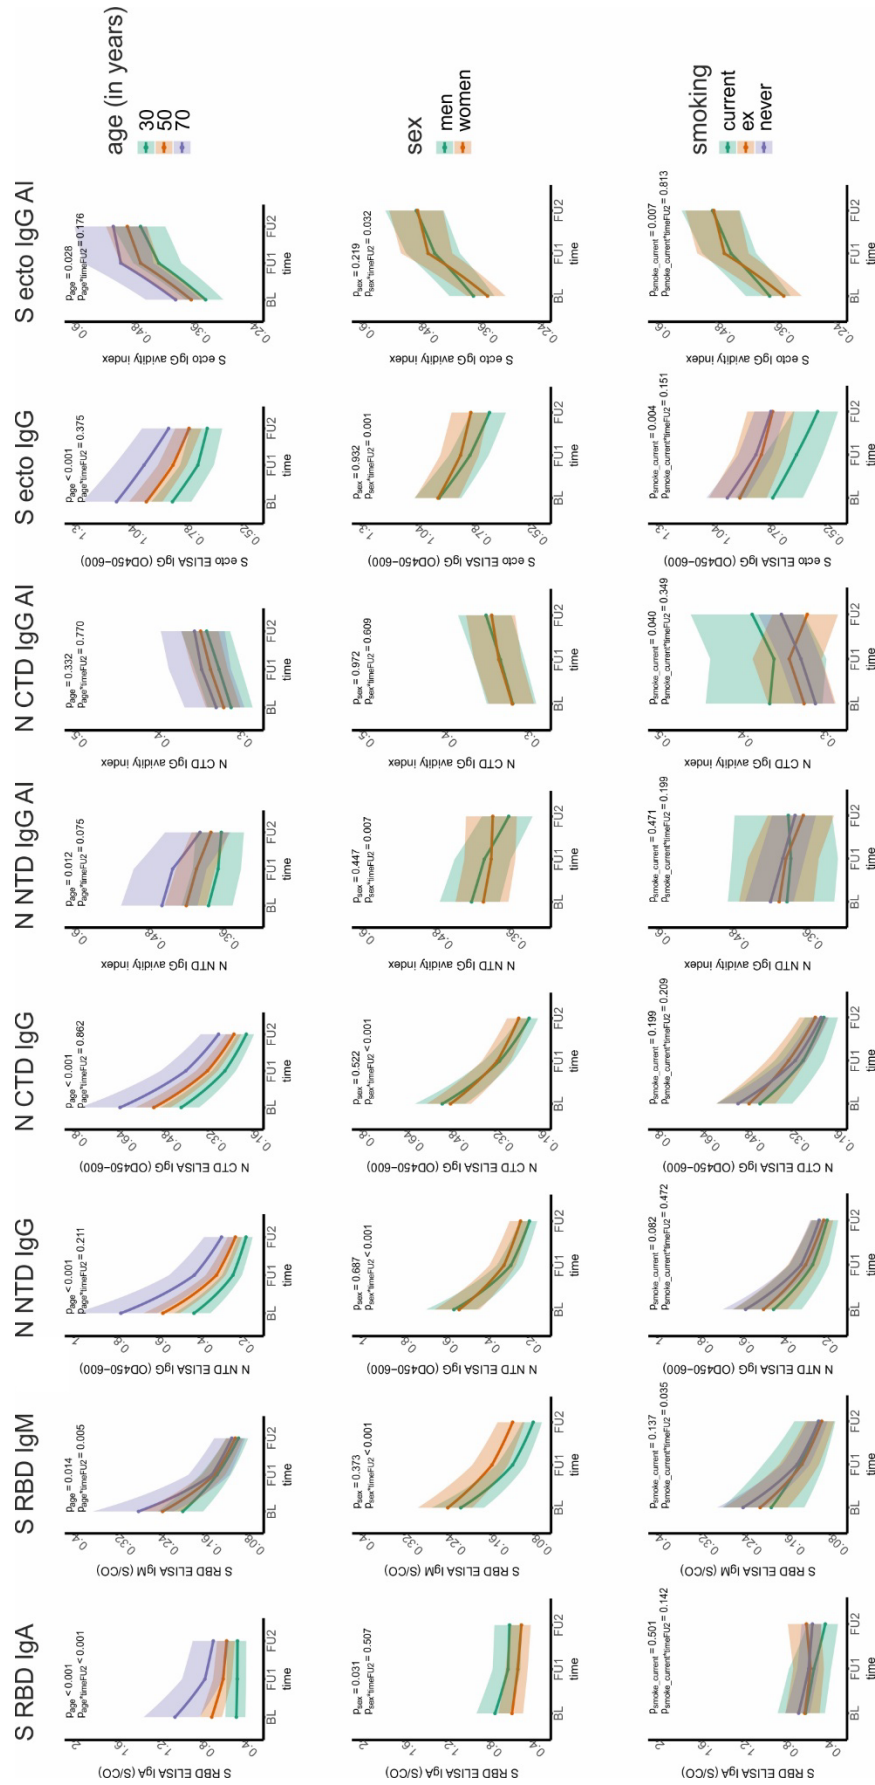

## Supplementary Tables

**Supplementary Table 1: Descriptive Statistics and sample sizes for all 13 measurements at time points BL, FU1 and FU2.** Sample sizes are reported in square brackets. Standard deviations (SD) and Interquartile Range (IQR) are given in parentheses for mean and median, respectively.

|                                          | <b>BL</b>          | <b>FU1</b>       | <b>FU2</b>       |
|------------------------------------------|--------------------|------------------|------------------|
| <b>S RBD ELISA IgG (S/CO)</b>            | <b>[n=211]</b>     | <b>[n=211]</b>   | <b>[n=211]</b>   |
| Mean (SD)                                | 3.54 (1.96)        | 2.64 (1.74)      | 2.29 (1.63)      |
| Median (IQR)                             | 3.12 (2.06-4.71)   | 2.11 (1.28-3.76) | 1.85 (0.96-3.25) |
| Min, max                                 | 0.57, 9.39         | 0.30, 7.80       | 0.15, 8.51       |
| <b>S RBD ELISA IgA (S/CO)</b>            | <b>[n=211]</b>     | <b>[n=211]</b>   | <b>[n=211]</b>   |
| Mean (SD)                                | 1.03 (1.75)        | 0.85 (1.27)      | 0.85 (1.53)      |
| Median (IQR)                             | 0.59 (0.38-1.11)   | 0.56 (0.31-0.89) | 0.5 (0.32-0.92)  |
| Min, max                                 | 0.05, 21.43        | 0.07, 15.2       | 0.04, 17.95      |
| <b>S RBD ELISA IgM (S/CO)</b>            | <b>[n=211]</b>     | <b>[n=211]</b>   | <b>[n=211]</b>   |
| Mean (SD)                                | 0.37 (0.47)        | 0.2 (0.21)       | 0.15 (0.19)      |
| Median (IQR)                             | 0.22 (0.11-0.39)   | 0.13 (0.07-0.23) | 0.09 (0.05-0.17) |
| Min, max                                 | 0.01, 3.79         | 0.02, 1.89       | 0.01, 1.93       |
| <b>S Elecsys (COI)</b>                   | <b>[n=210]</b>     | <b>[n=209]</b>   | <b>[n=211]</b>   |
| Mean (SD)                                | 304.3 (461.7)      | 423.1 (701.5)    | 750 (4516.5)     |
| Median (IQR)                             | 128 (50.9-324.5)   | 169 (67.7-452)   | 171 (61.8-512.5) |
| Min, max                                 | 0.8, 2581          | 0.9, 5114        | 0.7, 65163       |
| <b>N Elecsys (COI)</b>                   | <b>[n=211]</b>     | <b>[n=211]</b>   | <b>[n=211]</b>   |
| Mean (SD)                                | 75.4 (49.6)        | 63.5 (62.5)      | 41.4 (51.7)      |
| Median (IQR)                             | 79.4 (26.6-121.5)  | 43.2 (9.5-107)   | 22 (4.1-54.2)    |
| Min, max                                 | 1.1, 155           | 0.5, 210         | 0.2, 251         |
| <b>pseudovirus neutralization (ID50)</b> | <b>[n=210]</b>     | <b>[n=209]</b>   | <b>[n=207]</b>   |
| Mean (SD)                                | 168.5 (181.6)      | 132 (153.3)      | 144.3 (234.3)    |
| Median (IQR)                             | 120.2 (68.8-189.8) | 98.2 (47-157.5)  | 79 (41.8-151.3)  |
| Min, max                                 | 1, 1329            | 1, 1187          | 1, 2330          |
| <b>N NTD ELISA IgG (OD450-600)</b>       | <b>[n=191]</b>     | <b>[n=210]</b>   | <b>[n=211]</b>   |
| Mean (SD)                                | 0.72 (0.46)        | 0.43 (0.37)      | 0.32 (0.31)      |
| Median (IQR)                             | 0.64 (0.33-1.07)   | 0.29 (0.16-0.57) | 0.2 (0.12-0.37)  |
| Min, max                                 | 0.07, 1.7          | 0.04, 1.63       | 0.02, 1.57       |
| <b>N CTD ELISA IgG (OD450-600)</b>       | <b>[n=191]</b>     | <b>[n=210]</b>   | <b>[n=211]</b>   |
| Mean (SD)                                | 0.62 (0.36)        | 0.39 (0.28)      | 0.27 (0.2)       |
| Median (IQR)                             | 0.54 (0.32-0.9)    | 0.31 (0.19-0.52) | 0.22 (0.14-0.35) |
| Min, max                                 | 0.04, 1.57         | 0.06, 1.46       | 0.04, 1.23       |

Supplementary Material: Population-based study of the durability of humoral immunity after SARS-CoV-2 infection

|                                     |                  |                  |                  |
|-------------------------------------|------------------|------------------|------------------|
| <b>N NTD IgG avidity index</b>      | <b>[n=200]</b>   | <b>[n=210]</b>   | <b>[n=211]</b>   |
| Mean (SD)                           | 0.44 (0.17)      | 0.43 (0.16)      | 0.41 (0.16)      |
| Median (IQR)                        | 0.44 (0.32-0.53) | 0.42 (0.32-0.53) | 0.4 (0.29-0.52)  |
| Min, max                            | 0.07, 0.95       | 0.07, 0.86       | 0.06, 0.85       |
| <b>N CTD IgG avidity index</b>      | <b>[n=200]</b>   | <b>[n=210]</b>   | <b>[n=211]</b>   |
| Mean (SD)                           | 0.34 (0.15)      | 0.35 (0.11)      | 0.36 (0.11)      |
| Median (IQR)                        | 0.31 (0.25-0.41) | 0.34 (0.27-0.42) | 0.36 (0.29-0.43) |
| Min, max                            | 0.1, 1.19        | 0.1, 0.74        | 0.05, 0.68       |
| <b>S RBD IgG avidity index</b>      | <b>[n=193]</b>   | <b>[n=210]</b>   | <b>[n=211]</b>   |
| Mean (SD)                           | 0.31 (0.14)      | 0.41 (0.17)      | 0.46 (0.18)      |
| Median (IQR)                        | 0.29 (0.21-0.38) | 0.4 (0.28-0.51)  | 0.45 (0.32-0.57) |
| Min, max                            | 0.07, 0.8        | 0.06, 0.96       | 0.06, 1.06       |
| <b>S ecto ELISA IgG (OD450-600)</b> | <b>[n=188]</b>   | <b>[n=207]</b>   | <b>[n=208]</b>   |
| Mean (SD)                           | 1.02 (0.34)      | 0.89 (0.35)      | 0.84 (0.36)      |
| Median (IQR)                        | 1.01 (0.76-1.27) | 0.88 (0.64-1.18) | 0.85 (0.55-1.12) |
| Min, max                            | 0.21, 1.69       | 0.25, 1.6        | 0.16, 1.71       |
| <b>S ecto IgG avidity index</b>     | <b>[n=186]</b>   | <b>[n=207]</b>   | <b>[n=208]</b>   |
| Mean (SD)                           | 0.41 (0.19)      | 0.5 (0.2)        | 0.53 (0.2)       |
| Median (IQR)                        | 0.38 (0.26-0.53) | 0.48 (0.35-0.64) | 0.52 (0.37-0.65) |
| Min, max                            | 0.06, 0.87       | 0.05, 0.97       | 0.05, 1.04       |

**Supplementary Table 2: Spearman's rho and P-values for correlation of the different serological parameters at the three visits. Spearman's rho values (green background) and P-values (blue background) corresponding to Figure 2.**

|               | S Elicsys Ig   | N Elicsys Ig | S Elicsys Ig | S RBD IgG | S RBD IgA | S RBD IgM | S ecto IgG | N NTD IgG | NCTD IgG | Neutralization | S RBD IgG AI | N NTD IgG AI | NCTD IgG AI | S ecto IgG AI | Spearman's rho | P-value |  |
|---------------|----------------|--------------|--------------|-----------|-----------|-----------|------------|-----------|----------|----------------|--------------|--------------|-------------|---------------|----------------|---------|--|
| <b>BL</b>     | S Elicsys Ig   | 1.0000       | 0.4534       | 0.7862    | 0.1233    | 0.8224    | 0.5438     | 0.5366    | 0.6008   | 0.8334         | 0.3440       | 0.1855       | 0.8415      |               |                |         |  |
|               | N Elicsys Ig   | <0.0001      | 1.0000       | 0.4721    | 0.1522    | 0.2453    | 0.5168     | 0.8138    | 0.3844   | 0.3650         | 0.3711       | 0.2243       | 0.4036      |               |                |         |  |
|               | S RBD IgG      | <0.0001      | <0.0001      | 1.0000    | 0.9388    | 0.3004    | 0.8282     | 0.6372    | 0.6913   | 0.6008         | 0.2975       | 0.1115       | 0.6038      |               |                |         |  |
|               | S RBD IgA      | <0.0001      | 0.0003       | <0.0001   | 1.0000    | 0.3010    | 0.4758     | 0.5165    | 0.4703   | 0.3730         | 0.2219       | 0.1180       | 0.4371      |               |                |         |  |
|               | S RBD IgM      | <0.0001      | 0.0271       | <0.0001   | <0.0001   | 1.0000    | 0.2813     | 0.2379    | 0.1680   | 0.4086         | 0.0206       | 0.1009       | 0.0291      | 0.0368        |                |         |  |
|               | S ecto IgG     | <0.0001      | <0.0001      | <0.0001   | <0.0001   | <0.0001   | 1.0000     | 0.6184    | 0.5988   | 0.6579         | 0.6432       | 0.3559       | 0.2365      | 0.7309        |                |         |  |
|               | N NTD IgG      | <0.0001      | <0.0001      | <0.0001   | <0.0001   | 0.0009    | <0.0001    | 1.0000    | 0.6221   | 0.4802         | 0.4351       | 0.3928       | 0.1454      | 0.4486        |                |         |  |
|               | NCTD IgG       | <0.0001      | <0.0001      | <0.0001   | <0.0001   | 0.0202    | <0.0001    | <0.0001   | 1.0000   | 0.4077         | 0.4090       | 0.5069       | 0.3486      | 0.4783        |                |         |  |
|               | Neutralization | <0.0001      | <0.0001      | <0.0001   | <0.0001   | <0.0001   | <0.0001    | <0.0001   | <0.0001  | 1.0000         | 0.5206       | 0.2213       | 0.1285      | 0.4613        |                |         |  |
|               | S RBD IgG AI   | <0.0001      | <0.0001      | <0.0001   | <0.0001   | <0.0001   | 0.7761     | <0.0001   | <0.0001  | <0.0001        | <0.0001      | 1.0000       | 0.3468      | 0.2091        | 0.7752         |         |  |
|               | N NTD IgG AI   | <0.0001      | <0.0001      | <0.0001   | <0.0001   | 0.1552    | <0.0001    | <0.0001   | <0.0001  | <0.0001        | <0.0001      | <0.0001      | 1.0000      | 0.3765        | 0.3437         |         |  |
|               | NCTD IgG AI    | <0.0001      | 0.0014       | <0.0001   | <0.0001   | 0.0960    | 0.6825     | 0.0448    | <0.0001  | 0.0706         | <0.0001      | <0.0001      | 1.0000      | 0.2175        | 1.0000         |         |  |
| S ecto IgG AI | <0.0001        | <0.0001      | <0.0001      | <0.0001   | <0.0001   | 0.1644    | <0.0001    | <0.0001   | <0.0001  | <0.0001        | <0.0001      | <0.0001      | 0.0027      | 1.0000        |                |         |  |
| <b>FU1</b>    | S Elicsys Ig   | 1.0000       | 0.5402       | 0.8122    | 0.5284    | 0.0029    | 0.8659     | 0.4317    | 0.4749   | 0.6202         | 0.8162       | 0.2190       | 0.0632      | 0.8597        |                |         |  |
|               | N Elicsys Ig   | <0.0001      | 1.0000       | 0.5217    | 0.3396    | 0.0681    | 0.5774     | 0.5878    | 0.8627   | 0.3900         | 0.4099       | 0.3741       | 0.0577      | 0.4977        |                |         |  |
|               | S RBD IgG      | <0.0001      | <0.0001      | 1.0000    | 0.9064    | 0.1172    | 0.8805     | 0.4827    | 0.4823   | 0.5698         | 0.5035       | 0.2012       | 0.0579      | 0.6432        |                |         |  |
|               | S RBD IgA      | <0.0001      | <0.0001      | <0.0001   | 1.0000    | 0.1260    | 0.5630     | 0.3032    | 0.3435   | 0.3583         | 0.4245       | 0.2542       | 0.0084      | 0.4810        |                |         |  |
|               | S RBD IgM      | 0.9668       | 0.3251       | 0.0895    | 0.0677    | 1.0000    | 0.0812     | 0.1229    | 0.0753   | 0.1511         | 0.0815       | 0.0412       | 0.0207      | 0.0387        |                |         |  |
|               | S ecto IgG     | <0.0001      | <0.0001      | <0.0001   | <0.0001   | <0.0001   | 0.2449     | 1.0000    | 0.5017   | 0.5414         | 0.6582       | 0.8113       | 0.2420      | 0.0383        | 0.7527         |         |  |
|               | N NTD IgG      | <0.0001      | <0.0001      | <0.0001   | <0.0001   | <0.0001   | 0.0757     | <0.0001   | 1.0000   | 0.5726         | 0.3524       | 0.3780       | 0.1591      | 0.0334        | 0.4022         |         |  |
|               | NCTD IgG       | <0.0001      | <0.0001      | <0.0001   | <0.0001   | <0.0001   | 0.2772     | <0.0001   | <0.0001  | 1.0000         | 0.3019       | 0.3493       | 0.3236      | 0.0011        | 0.4271         |         |  |
|               | Neutralization | <0.0001      | <0.0001      | <0.0001   | <0.0001   | 0.0290    | 0.2394     | <0.0001   | <0.0001  | <0.0001        | <0.0001      | 0.4777       | 0.1239      | 0.0404        | 0.5581         |         |  |
|               | S RBD IgG AI   | <0.0001      | <0.0001      | <0.0001   | <0.0001   | <0.0001   | 0.5527     | 0.0004    | <0.0001  | 0.0746         | 1.0000       | 0.2599       | 0.0156      | 0.3352        |                |         |  |
|               | N NTD IgG AI   | 0.0015       | <0.0001      | 0.0034    | 0.0002    | 0.0002    | 0.7652     | 0.6305    | 0.9871   | 0.9871         | 0.8224       | 0.0461       | 1.0000      | 0.0111        |                |         |  |
|               | NCTD IgG AI    | 0.3648       | 0.4057       | 0.4035    | 0.9036    | 0.9036    | 0.5799     | <0.0001   | <0.0001  | <0.0001        | <0.0001      | 0.0008       | 0.8737      | 1.0000        |                |         |  |
| <b>FU2</b>    | S ecto IgG AI  | 1.0000       | 0.5498       | 0.8418    | 0.5652    | 0.0186    | 0.8568     | 0.3834    | 0.4546   | 0.5149         | 0.8123       | 0.1119       | 0.1603      | 0.8686        |                |         |  |
|               | N Elicsys Ig   | <0.0001      | 1.0000       | 0.5464    | 0.3277    | 0.0923    | 0.5855     | 0.5753    | 0.7857   | 0.4009         | 0.3456       | 0.3348       | 0.1859      | 0.4652        |                |         |  |
|               | S RBD IgG      | <0.0001      | <0.0001      | 1.0000    | 0.9198    | 0.1144    | 0.8920     | 0.4288    | 0.4865   | 0.5813         | 0.5451       | 0.1246       | 0.1235      | 0.8940        |                |         |  |
|               | S RBD IgA      | <0.0001      | <0.0001      | <0.0001   | 1.0000    | 0.1172    | 0.5436     | 0.2533    | 0.3171   | 0.4168         | 0.4666       | 0.1483       | 0.0518      | 0.5089        |                |         |  |
|               | S RBD IgM      | 0.7884       | 0.1816       | 0.0874    | 0.0894    | 1.0000    | 0.1142     | 0.1527    | 0.1294   | 0.1949         | 0.0803       | 0.0183       | 0.0618      | 0.0187        |                |         |  |
|               | S ecto IgG     | <0.0001      | <0.0001      | <0.0001   | <0.0001   | <0.0001   | 0.1066     | 1.0000    | 0.4377   | 0.5376         | 0.6130       | 0.1027       | 0.1367      | 0.7647        |                |         |  |
|               | N NTD IgG      | <0.0001      | <0.0001      | <0.0001   | <0.0001   | 0.0266    | <0.0001    | 1.0000    | 0.5470   | 0.2870         | 0.2066       | 0.0341       | 0.0712      | 0.3084        |                |         |  |
|               | NCTD IgG       | <0.0001      | <0.0001      | <0.0001   | <0.0001   | 0.0606    | <0.0001    | <0.0001   | 1.0000   | 0.2924         | 0.2692       | 0.0390       | 0.1330      | 0.3923        |                |         |  |
|               | Neutralization | <0.0001      | <0.0001      | <0.0001   | <0.0001   | 0.0046    | <0.0001    | <0.0001   | <0.0001  | 1.0000         | 0.3559       | 0.0296       | 0.0897      | 0.4687        |                |         |  |
|               | S RBD IgG AI   | <0.0001      | <0.0001      | <0.0001   | <0.0001   | <0.0001   | 0.2456     | <0.0001   | 0.0026   | <0.0001        | 1.0000       | 0.1898       | 0.0706      | 0.8078        |                |         |  |
|               | N NTD IgG AI   | 0.1052       | <0.0001      | 0.0710    | 0.0313    | 0.7921    | 0.1399     | 0.6221    | 0.0001   | 0.6700         | 0.0057       | 1.0000       | 0.2023      | 0.1167        |                |         |  |
|               | NCTD IgG AI    | 0.0188       | 0.0068       | 0.0735    | 0.4542    | 0.3714    | 0.0490     | 0.3036    | 0.0637   | 0.1953         | 0.3077       | 0.0032       | 1.0000      | 0.0966        |                |         |  |
| S ecto IgG AI | <0.0001        | <0.0001      | <0.0001      | <0.0001   | <0.0001   | 0.7881    | <0.0001    | <0.0001   | <0.0001  | <0.0001        | <0.0001      | 0.0831       | 0.1652      | 1.0000        |                |         |  |

**Supplementary Table 3: Association of age, sex, and smoking on eight antibody and avidity levels and level change from linear mixed models.** This table shows results from eight linear mixed models (LMMs), one for each of the following eight antibody and avidity levels as outcome: S RBD ELISA IgA, S RBD ELISA IgM, N NTD ELISA IgG, N CTD ELISA IgG, N NTD IgG AI, N CTD IgG AI, S ecto ELISA IgG, and S ecto ELISA IgG AI (ln-transformed to ensure approximate normal distribution). The covariates were 2 time-variables (timeFU1, timeFU2) and age (centered at 50 years), sex (1=women, 0=men), and 2 smoking variables (current smoking, ex-smoking versus never smokers as reference) as well as their interactions with the time-variables. For each of age, sex, and smoking variables, we show the covariate estimates and standard errors (s.e.) on the natural logarithm of levels (1<sup>st</sup> column) and on titer change between BL and FU1 or FU2 (2<sup>nd</sup> column or 3<sup>rd</sup> column, respectively; i.e. from the interaction terms with timeFU1 or timeFU2). In the first row per outcome, we show the intercept (1<sup>st</sup> column) and the association of timeFU1 or timeFU2 (2<sup>nd</sup> or 3<sup>rd</sup> column, respectively). The analogous results for the other 5 levels are shown in Table 3.

|                      | Association with level<br>coefficient (s.e.); P | Association with change<br>until FU1 | Association with change<br>until FU2 |
|----------------------|-------------------------------------------------|--------------------------------------|--------------------------------------|
| <b>S RBD IgA</b>     |                                                 |                                      |                                      |
| intercept/time point | -0.195 (s.e.: 0.092; p: 0.034)                  | -0.226 (s.e.: 0.049; p<0.001)        | -0.275 (s.e.: 0.05; p<0.001)         |
| age                  | 0.020 (s.e.: 0.003; p<0.001)                    | -0.007 (s.e.: 0.002; p<0.001)        | -0.010 (s.e.: 0.002; p<0.001)        |
| sex                  | -0.244 (s.e.: 0.112; p: 0.031)                  | 0.084 (s.e.: 0.059; p: 0.156)        | 0.039 (s.e.: 0.059; p: 0.507)        |
| smoker_current       | -0.102 (s.e.: 0.151; p: 0.501)                  | 0.012 (s.e.: 0.107; p: 0.908)        | -0.152 (s.e.: 0.103; p: 0.142)       |
| smoker_ex            | -0.09 (s.e.: 0.117; p: 0.441)                   | 0.059 (s.e.: 0.072; p: 0.413)        | 0.189 (s.e.: 0.072; p: 0.009)        |
| <b>S RBD IgM</b>     |                                                 |                                      |                                      |
| intercept/time point | -1.446 (s.e.: 0.097; p<0.001)                   | -0.655 (s.e.: 0.055; p<0.001)        | -1.043 (s.e.: 0.056; p<0.001)        |
| age                  | 0.009 (s.e.: 0.003; p: 0.014)                   | -0.007 (s.e.: 0.002; p<0.001)        | -0.006 (s.e.: 0.002; p: 0.005)       |
| sex                  | 0.106 (s.e.: 0.119; p: 0.373)                   | 0.172 (s.e.: 0.066; p: 0.01)         | 0.281 (s.e.: 0.067; p<0.001)         |
| smoker_current       | -0.245 (s.e.: 0.164; p: 0.137)                  | 0.213 (s.e.: 0.12; p: 0.077)         | 0.247 (s.e.: 0.116; p: 0.035)        |
| smoker_ex            | -0.141 (s.e.: 0.126; p: 0.262)                  | 0.075 (s.e.: 0.08; p: 0.353)         | 0.074 (s.e.: 0.08; p: 0.355)         |
| <b>N NTD IgG</b>     |                                                 |                                      |                                      |
| intercept/time point | -0.469 (s.e.: 0.094; p<0.001)                   | -0.707 (s.e.: 0.05; p<0.001)         | -1.085 (s.e.: 0.05; p<0.001)         |
| age                  | 0.015 (s.e.: 0.003; p<0.001)                    | -0.001 (s.e.: 0.002; p: 0.715)       | -0.002 (s.e.: 0.002; p: 0.211)       |
| sex                  | -0.046 (s.e.: 0.115; p: 0.687)                  | 0.157 (s.e.: 0.059; p: 0.008)        | 0.246 (s.e.: 0.059; p<0.001)         |
| smoker_current       | -0.264 (s.e.: 0.151; p: 0.082)                  | 0.07 (s.e.: 0.107; p: 0.515)         | 0.075 (s.e.: 0.104; p: 0.472)        |
| smoker_ex            | -0.161 (s.e.: 0.118; p: 0.172)                  | 0.091 (s.e.: 0.072; p: 0.209)        | 0.059 (s.e.: 0.073; p: 0.422)        |
| <b>N CTD IgG</b>     |                                                 |                                      |                                      |
| intercept/time point | -0.6 (s.e.: 0.077; p<0.001)                     | -0.558 (s.e.: 0.045; p<0.001)        | -0.992 (s.e.: 0.045; p<0.001)        |
| age                  | 0.011 (s.e.: 0.003; p<0.001)                    | 0.000 (s.e.: 0.002; p: 0.906)        | 0.000 (s.e.: 0.002; p: 0.862)        |
| sex                  | -0.06 (s.e.: 0.094; p: 0.522)                   | 0.088 (s.e.: 0.053; p: 0.101)        | 0.231 (s.e.: 0.054; p<0.001)         |
| smoker_current       | -0.167 (s.e.: 0.129; p: 0.199)                  | 0.071 (s.e.: 0.097; p: 0.466)        | 0.118 (s.e.: 0.094; p: 0.209)        |
| smoker_ex            | -0.081 (s.e.: 0.099; p: 0.417)                  | 0.155 (s.e.: 0.065; p: 0.018)        | 0.172 (s.e.: 0.066; p: 0.01)         |
| <b>N NTD IgG AI</b>  |                                                 |                                      |                                      |
| intercept/time point | -0.836 (s.e.: 0.051; p<0.001)                   | -0.059 (s.e.: 0.036; p: 0.104)       | -0.173 (s.e.: 0.036; p<0.001)        |
| age                  | 0.005 (s.e.: 0.002; p: 0.012)                   | 0.000 (s.e.: 0.001; p: 0.944)        | -0.002 (s.e.: 0.001; p: 0.075)       |
| sex                  | -0.047 (s.e.: 0.062; p: 0.447)                  | 0.018 (s.e.: 0.043; p: 0.668)        | 0.117 (s.e.: 0.043; p: 0.007)        |
| smoker_current       | -0.067 (s.e.: 0.093; p: 0.471)                  | 0.033 (s.e.: 0.077; p: 0.67)         | 0.096 (s.e.: 0.075; p: 0.199)        |
| smoker_ex            | -0.035 (s.e.: 0.068; p: 0.614)                  | 0.021 (s.e.: 0.051; p: 0.678)        | -0.002 (s.e.: 0.052; p: 0.971)       |

**Supplementary Material: Population-based study of the durability of humoral immunity after SARS-CoV-2 infection**

**N CTD IgG AI**

|                      |                               |                                |                                |
|----------------------|-------------------------------|--------------------------------|--------------------------------|
| intercept/time point | -1.173 (s.e.: 0.042; p<0.001) | 0.054 (s.e.: 0.036; p: 0.13)   | 0.136 (s.e.: 0.036; p<0.001)   |
| age                  | 0.001 (s.e.: 0.001; p: 0.332) | 0.000 (s.e.: 0.001; p: 0.897)  | 0.000 (s.e.: 0.001; p: 0.77)   |
| sex                  | 0.002 (s.e.: 0.05; p: 0.972)  | 0.004 (s.e.: 0.042; p: 0.926)  | -0.022 (s.e.: 0.042; p: 0.609) |
| smoker_current       | 0.165 (s.e.: 0.08; p: 0.04)   | -0.07 (s.e.: 0.076; p: 0.357)  | -0.069 (s.e.: 0.073; p: 0.349) |
| smoker_ex            | 0.044 (s.e.: 0.058; p: 0.448) | -0.001 (s.e.: 0.051; p: 0.981) | -0.138 (s.e.: 0.051; p: 0.008) |

**S ecto IgG**

|                      |                                |                                |                                |
|----------------------|--------------------------------|--------------------------------|--------------------------------|
| intercept/time point | -0.005 (s.e.: 0.05; p: 0.926)  | -0.17 (s.e.: 0.027; p<0.001)   | -0.294 (s.e.: 0.028; p<0.001)  |
| age                  | 0.007 (s.e.: 0.002; p<0.001)   | 0.001 (s.e.: 0.001; p: 0.473)  | -0.001 (s.e.: 0.001; p: 0.375) |
| sex                  | 0.005 (s.e.: 0.062; p: 0.932)  | 0.048 (s.e.: 0.033; p: 0.143)  | 0.111 (s.e.: 0.033; p: 0.001)  |
| smoker_current       | -0.243 (s.e.: 0.085; p: 0.004) | -0.009 (s.e.: 0.062; p: 0.885) | -0.085 (s.e.: 0.059; p: 0.151) |
| smoker_ex            | -0.061 (s.e.: 0.066; p: 0.354) | 0.031 (s.e.: 0.04; p: 0.444)   | 0.051 (s.e.: 0.041; p: 0.212)  |

**S ecto IgG AI**

|                      |                                |                                |                                |
|----------------------|--------------------------------|--------------------------------|--------------------------------|
| intercept/time point | -0.945 (s.e.: 0.053; p<0.001)  | 0.189 (s.e.: 0.029; p<0.001)   | 0.25 (s.e.: 0.029; p<0.001)    |
| age                  | 0.004 (s.e.: 0.002; p: 0.028)  | 0.000 (s.e.: 0.001; p: 0.952)  | -0.001 (s.e.: 0.001; p: 0.176) |
| sex                  | -0.079 (s.e.: 0.064; p: 0.219) | 0.109 (s.e.: 0.034; p: 0.002)  | 0.074 (s.e.: 0.034; p: 0.032)  |
| smoker_current       | -0.237 (s.e.: 0.088; p: 0.007) | -0.033 (s.e.: 0.064; p: 0.608) | 0.015 (s.e.: 0.061; p: 0.813)  |
| smoker_ex            | -0.028 (s.e.: 0.069; p: 0.688) | 0.018 (s.e.: 0.042; p: 0.664)  | 0.057 (s.e.: 0.042; p: 0.176)  |

---

**Supplementary Table 4: Linear Mixed Model regression output for 13 assays.** Linear Mixed Model (LMM) regression output for each of the 13 assays (outcome, log-transformed). The model in the column “smoking” is the main model (including the covariates timeFU1, timeFU2 (two time variables), age (years), sex (1=women, 0=men), and 2 smoking variables (current smoker, ex-smoker, never smoker as reference) as well as their interaction with timeFU1 and timeFU2; the model in the column “base” is the same, except it does not include the 2 smoking variables; and the model in the column “symptomatic” additionally includes symptoms (yes or maybe versus asymptomatic as reference) and their interaction with age. Beta estimates, standard errors (s.e.) and P-values are reported.



Supplementary Material: Population-based study of the durability of humoral immunity after SARS-CoV-2 infection

| outcome        | beta estimates         | base                           | smoking                        | symptomatic                    |
|----------------|------------------------|--------------------------------|--------------------------------|--------------------------------|
| log(S RBD IgG) | intercept              | 1.195 (s.e.: 0.068; p<0.001)   | 1.265 (s.e.: 0.075; p<0.001)   | 1.159 (s.e.: 0.134; p<0.001)   |
|                | timeFU1                | -0.423 (s.e.: 0.035; p<0.001)  | -0.462 (s.e.: 0.04; p<0.001)   | -0.461 (s.e.: 0.04; p<0.001)   |
|                | timeFU2                | -0.638 (s.e.: 0.035; p<0.001)  | -0.658 (s.e.: 0.04; p<0.001)   | -0.658 (s.e.: 0.04; p<0.001)   |
|                | age                    | 0.012 (s.e.: 0.003; p<0.001)   | 0.013 (s.e.: 0.003; p<0.001)   | 0.006 (s.e.: 0.006; p: 0.377)  |
|                | sex                    | -0.091 (s.e.: 0.093; p: 0.329) | -0.104 (s.e.: 0.091; p: 0.258) | -0.076 (s.e.: 0.091; p: 0.402) |
|                | smoker_current         | n.a.                           | -0.402 (s.e.: 0.122; p: 0.001) | -0.409 (s.e.: 0.122; p: 0.001) |
|                | smoker_ex              | n.a.                           | -0.111 (s.e.: 0.094; p: 0.239) | -0.12 (s.e.: 0.095; p: 0.206)  |
|                | symptomatic_yes        | n.a.                           | n.a.                           | 0.236 (s.e.: 0.149; p: 0.115)  |
|                | symptomatic_maybe      | n.a.                           | n.a.                           | 0.053 (s.e.: 0.129; p: 0.679)  |
|                | age*timeFU1            | 0.001 (s.e.: 0.001; p: 0.3)    | 0.001 (s.e.: 0.001; p: 0.359)  | 0.001 (s.e.: 0.001; p: 0.357)  |
|                | age*timeFU2            | 0 (s.e.: 0.001; p: 0.787)      | -0.001 (s.e.: 0.001; p: 0.464) | -0.001 (s.e.: 0.001; p: 0.469) |
|                | sex*timeFU1            | 0.122 (s.e.: 0.048; p: 0.012)  | 0.13 (s.e.: 0.047; p: 0.006)   | 0.13 (s.e.: 0.047; p: 0.006)   |
|                | sex*timeFU2            | 0.18 (s.e.: 0.048; p<0.001)    | 0.166 (s.e.: 0.048; p: 0.001)  | 0.166 (s.e.: 0.048; p: 0.001)  |
|                | smoker_current*timeFU1 | n.a.                           | 0.054 (s.e.: 0.086; p: 0.527)  | 0.055 (s.e.: 0.086; p: 0.524)  |
|                | smoker_current*timeFU2 | n.a.                           | -0.027 (s.e.: 0.083; p: 0.744) | -0.026 (s.e.: 0.083; p: 0.753) |
|                | smoker_ex*timeFU1      | n.a.                           | 0.112 (s.e.: 0.057; p: 0.051)  | 0.112 (s.e.: 0.057; p: 0.052)  |
|                | smoker_ex*timeFU2      | n.a.                           | 0.135 (s.e.: 0.058; p: 0.021)  | 0.134 (s.e.: 0.058; p: 0.022)  |
|                | age*symptomatic_yes    | n.a.                           | n.a.                           | 0.018 (s.e.: 0.008; p: 0.027)  |
|                | age*symptomatic_maybe  | n.a.                           | n.a.                           | 0.004 (s.e.: 0.007; p: 0.567)  |
| log(S RBD IgA) | intercept              | -0.229 (s.e.: 0.083; p: 0.006) | -0.195 (s.e.: 0.092; p: 0.034) | -0.471 (s.e.: 0.165; p: 0.005) |
|                | timeFU1                | -0.208 (s.e.: 0.044; p<0.001)  | -0.226 (s.e.: 0.049; p<0.001)  | -0.226 (s.e.: 0.049; p<0.001)  |
|                | timeFU2                | -0.248 (s.e.: 0.044; p<0.001)  | -0.275 (s.e.: 0.05; p<0.001)   | -0.275 (s.e.: 0.05; p<0.001)   |
|                | age                    | 0.02 (s.e.: 0.003; p<0.001)    | 0.02 (s.e.: 0.003; p<0.001)    | 0.007 (s.e.: 0.008; p: 0.371)  |
|                | sex                    | -0.239 (s.e.: 0.113; p: 0.034) | -0.244 (s.e.: 0.112; p: 0.031) | -0.218 (s.e.: 0.112; p: 0.053) |
|                | smoker_current         | n.a.                           | -0.102 (s.e.: 0.151; p: 0.501) | -0.091 (s.e.: 0.151; p: 0.546) |
|                | smoker_ex              | n.a.                           | -0.09 (s.e.: 0.117; p: 0.441)  | -0.08 (s.e.: 0.117; p: 0.496)  |
|                | symptomatic_yes        | n.a.                           | n.a.                           | 0.371 (s.e.: 0.184; p: 0.044)  |
|                | symptomatic_maybe      | n.a.                           | n.a.                           | 0.277 (s.e.: 0.159; p: 0.082)  |
|                | age*timeFU1            | -0.007 (s.e.: 0.002; p<0.001)  | -0.007 (s.e.: 0.002; p<0.001)  | -0.007 (s.e.: 0.002; p<0.001)  |
|                | age*timeFU2            | -0.009 (s.e.: 0.002; p<0.001)  | -0.01 (s.e.: 0.002; p<0.001)   | -0.01 (s.e.: 0.002; p<0.001)   |
|                | sex*timeFU1            | 0.081 (s.e.: 0.059; p: 0.172)  | 0.084 (s.e.: 0.059; p: 0.156)  | 0.084 (s.e.: 0.059; p: 0.156)  |
|                | sex*timeFU2            | 0.046 (s.e.: 0.059; p: 0.442)  | 0.039 (s.e.: 0.059; p: 0.507)  | 0.039 (s.e.: 0.059; p: 0.507)  |
|                | smoker_current*timeFU1 | n.a.                           | 0.012 (s.e.: 0.107; p: 0.908)  | 0.013 (s.e.: 0.107; p: 0.906)  |
|                | smoker_current*timeFU2 | n.a.                           | -0.152 (s.e.: 0.103; p: 0.142) | -0.151 (s.e.: 0.103; p: 0.146) |

Supplementary Material: Population-based study of the durability of humoral immunity after SARS-CoV-2 infection

| outcome           | beta estimates         | base                           | smoking                        | symptomatic                    |
|-------------------|------------------------|--------------------------------|--------------------------------|--------------------------------|
|                   | smoker_ex*timeFU1      | n.a.                           | 0.059 (s.e.: 0.072; p: 0.413)  | 0.058 (s.e.: 0.072; p: 0.417)  |
|                   | smoker_ex*timeFU2      | n.a.                           | 0.189 (s.e.: 0.072; p: 0.009)  | 0.188 (s.e.: 0.072; p: 0.01)   |
|                   | age*symptomatic_yes    | n.a.                           | n.a.                           | 0.021 (s.e.: 0.01; p: 0.043)   |
|                   | age*symptomatic_maybe  | n.a.                           | n.a.                           | 0.013 (s.e.: 0.009; p: 0.126)  |
| log(S RBD IgM)    | intercept              | -1.508 (s.e.: 0.088; p<0.001)  | -1.446 (s.e.: 0.097; p<0.001)  | -1.643 (s.e.: 0.174; p<0.001)  |
|                   | timeFU1                | -0.614 (s.e.: 0.049; p<0.001)  | -0.655 (s.e.: 0.055; p<0.001)  | -0.655 (s.e.: 0.055; p<0.001)  |
|                   | timeFU2                | -0.996 (s.e.: 0.049; p<0.001)  | -1.043 (s.e.: 0.056; p<0.001)  | -1.043 (s.e.: 0.056; p<0.001)  |
|                   | age                    | 0.008 (s.e.: 0.003; p: 0.017)  | 0.009 (s.e.: 0.003; p: 0.014)  | -0.01 (s.e.: 0.008; p: 0.223)  |
|                   | sex                    | 0.116 (s.e.: 0.119; p: 0.332)  | 0.106 (s.e.: 0.119; p: 0.373)  | 0.124 (s.e.: 0.119; p: 0.297)  |
|                   | smoker_current         | n.a.                           | -0.245 (s.e.: 0.164; p: 0.137) | -0.246 (s.e.: 0.165; p: 0.136) |
|                   | smoker_ex              | n.a.                           | -0.141 (s.e.: 0.126; p: 0.262) | -0.137 (s.e.: 0.126; p: 0.279) |
|                   | symptomatic_yes        | n.a.                           | n.a.                           | 0.126 (s.e.: 0.194; p: 0.514)  |
|                   | symptomatic_maybe      | n.a.                           | n.a.                           | 0.262 (s.e.: 0.167; p: 0.117)  |
|                   | age*timeFU1            | -0.007 (s.e.: 0.002; p<0.001)  | -0.007 (s.e.: 0.002; p<0.001)  | -0.007 (s.e.: 0.002; p<0.001)  |
|                   | age*timeFU2            | -0.006 (s.e.: 0.002; p: 0.004) | -0.006 (s.e.: 0.002; p: 0.005) | -0.006 (s.e.: 0.002; p: 0.005) |
|                   | sex*timeFU1            | 0.164 (s.e.: 0.066; p: 0.013)  | 0.172 (s.e.: 0.066; p: 0.01)   | 0.172 (s.e.: 0.066; p: 0.01)   |
|                   | sex*timeFU2            | 0.27 (s.e.: 0.066; p<0.001)    | 0.281 (s.e.: 0.067; p<0.001)   | 0.281 (s.e.: 0.067; p<0.001)   |
|                   | smoker_current*timeFU1 | n.a.                           | 0.213 (s.e.: 0.12; p: 0.077)   | 0.213 (s.e.: 0.12; p: 0.077)   |
|                   | smoker_current*timeFU2 | n.a.                           | 0.247 (s.e.: 0.116; p: 0.035)  | 0.249 (s.e.: 0.116; p: 0.033)  |
|                   | smoker_ex*timeFU1      | n.a.                           | 0.075 (s.e.: 0.08; p: 0.353)   | 0.074 (s.e.: 0.08; p: 0.355)   |
|                   | smoker_ex*timeFU2      | n.a.                           | 0.084 (s.e.: 0.082; p: 0.302)  | 0.084 (s.e.: 0.082; p: 0.305)  |
|                   | age*symptomatic_yes    | n.a.                           | n.a.                           | 0.02 (s.e.: 0.011; p: 0.062)   |
|                   | age*symptomatic_maybe  | n.a.                           | n.a.                           | 0.024 (s.e.: 0.009; p: 0.011)  |
| log(S Elecsys Ig) | intercept              | 5.077 (s.e.: 0.145; p<0.001)   | 5.186 (s.e.: 0.156; p<0.001)   | 5.053 (s.e.: 0.28; p<0.001)    |
|                   | timeFU1                | 0.124 (s.e.: 0.062; p: 0.047)  | 0.073 (s.e.: 0.069; p: 0.291)  | 0.074 (s.e.: 0.069; p: 0.289)  |
|                   | timeFU2                | 0.123 (s.e.: 0.062; p: 0.049)  | 0.078 (s.e.: 0.07; p: 0.262)   | 0.079 (s.e.: 0.07; p: 0.258)   |
|                   | age                    | 0.021 (s.e.: 0.006; p<0.001)   | 0.021 (s.e.: 0.006; p<0.001)   | 0.022 (s.e.: 0.013; p: 0.102)  |
|                   | sex                    | -0.263 (s.e.: 0.198; p: 0.183) | -0.283 (s.e.: 0.194; p: 0.144) | -0.221 (s.e.: 0.189; p: 0.244) |
|                   | smoker_current         | n.a.                           | -0.628 (s.e.: 0.236; p: 0.008) | -0.661 (s.e.: 0.235; p: 0.005) |
|                   | smoker_ex              | n.a.                           | -0.176 (s.e.: 0.188; p: 0.349) | -0.205 (s.e.: 0.186; p: 0.271) |
|                   | symptomatic_yes        | n.a.                           | n.a.                           | 0.45 (s.e.: 0.315; p: 0.154)   |
|                   | symptomatic_maybe      | n.a.                           | n.a.                           | -0.038 (s.e.: 0.272; p: 0.888) |
|                   | age*timeFU1            | -0.001 (s.e.: 0.002; p: 0.834) | -0.001 (s.e.: 0.002; p: 0.736) | -0.001 (s.e.: 0.002; p: 0.744) |
|                   | age*timeFU2            | -0.001 (s.e.: 0.002; p: 0.6)   | -0.003 (s.e.: 0.002; p: 0.234) | -0.003 (s.e.: 0.002; p: 0.239) |
|                   | sex*timeFU1            | 0.246 (s.e.: 0.085; p: 0.004)  | 0.253 (s.e.: 0.083; p: 0.003)  | 0.253 (s.e.: 0.083; p: 0.003)  |
|                   | sex*timeFU2            | 0.31 (s.e.: 0.085; p<0.001)    | 0.279 (s.e.: 0.084; p: 0.001)  | 0.278 (s.e.: 0.084; p: 0.001)  |

Supplementary Material: Population-based study of the durability of humoral immunity after SARS-CoV-2 infection

| outcome             | beta estimates         | base                           | smoking                        | symptomatic                    |
|---------------------|------------------------|--------------------------------|--------------------------------|--------------------------------|
|                     | smoker_current*timeFU1 | n.a.                           | -0.069 (s.e.: 0.151; p: 0.645) | -0.07 (s.e.: 0.151; p: 0.645)  |
|                     | smoker_current*timeFU2 | n.a.                           | -0.17 (s.e.: 0.146; p: 0.247)  | -0.168 (s.e.: 0.146; p: 0.252) |
|                     | smoker_ex*timeFU1      | n.a.                           | 0.214 (s.e.: 0.101; p: 0.035)  | 0.213 (s.e.: 0.101; p: 0.036)  |
|                     | smoker_ex*timeFU2      | n.a.                           | 0.324 (s.e.: 0.102; p: 0.002)  | 0.323 (s.e.: 0.102; p: 0.002)  |
|                     | age*symptomatic_yes    | n.a.                           | n.a.                           | 0.034 (s.e.: 0.018; p: 0.058)  |
|                     | age*symptomatic_maybe  | n.a.                           | n.a.                           | -0.015 (s.e.: 0.015; p: 0.32)  |
| log(N Elecsys Ig)   | intercept              | 3.965 (s.e.: 0.145; p<0.001)   | 4.035 (s.e.: 0.158; p<0.001)   | 3.396 (s.e.: 0.28; p<0.001)    |
|                     | timeFU1                | -0.472 (s.e.: 0.071; p<0.001)  | -0.448 (s.e.: 0.08; p<0.001)   | -0.448 (s.e.: 0.08; p<0.001)   |
|                     | timeFU2                | -1.244 (s.e.: 0.071; p<0.001)  | -1.149 (s.e.: 0.081; p<0.001)  | -1.149 (s.e.: 0.081; p<0.001)  |
|                     | age                    | 0.011 (s.e.: 0.006; p: 0.058)  | 0.01 (s.e.: 0.006; p: 0.066)   | 0.008 (s.e.: 0.013; p: 0.556)  |
|                     | sex                    | -0.085 (s.e.: 0.197; p: 0.665) | -0.1 (s.e.: 0.193; p: 0.604)   | -0.044 (s.e.: 0.19; p: 0.817)  |
|                     | smoker_current         | n.a.                           | -0.528 (s.e.: 0.253; p: 0.038) | -0.509 (s.e.: 0.251; p: 0.044) |
|                     | smoker_ex              | n.a.                           | -0.069 (s.e.: 0.197; p: 0.725) | -0.031 (s.e.: 0.196; p: 0.873) |
|                     | symptomatic_yes        | n.a.                           | n.a.                           | 0.808 (s.e.: 0.312; p: 0.01)   |
|                     | symptomatic_maybe      | n.a.                           | n.a.                           | 0.617 (s.e.: 0.269; p: 0.022)  |
|                     | age*timeFU1            | 0.014 (s.e.: 0.003; p<0.001)   | 0.015 (s.e.: 0.003; p<0.001)   | 0.015 (s.e.: 0.003; p<0.001)   |
|                     | age*timeFU2            | 0.02 (s.e.: 0.003; p<0.001)    | 0.021 (s.e.: 0.003; p<0.001)   | 0.021 (s.e.: 0.003; p<0.001)   |
|                     | sex*timeFU1            | 0.046 (s.e.: 0.097; p: 0.639)  | 0.049 (s.e.: 0.096; p: 0.613)  | 0.048 (s.e.: 0.096; p: 0.615)  |
|                     | sex*timeFU2            | 0.31 (s.e.: 0.097; p: 0.001)   | 0.287 (s.e.: 0.097; p: 0.003)  | 0.286 (s.e.: 0.097; p: 0.003)  |
|                     | smoker_current*timeFU1 | n.a.                           | -0.179 (s.e.: 0.174; p: 0.305) | -0.18 (s.e.: 0.174; p: 0.302)  |
|                     | smoker_current*timeFU2 | n.a.                           | -0.424 (s.e.: 0.169; p: 0.012) | -0.42 (s.e.: 0.169; p: 0.013)  |
|                     | smoker_ex*timeFU1      | n.a.                           | -0.037 (s.e.: 0.117; p: 0.748) | -0.039 (s.e.: 0.117; p: 0.741) |
|                     | smoker_ex*timeFU2      | n.a.                           | -0.094 (s.e.: 0.118; p: 0.426) | -0.096 (s.e.: 0.118; p: 0.415) |
|                     | age*symptomatic_yes    | n.a.                           | n.a.                           | 0.032 (s.e.: 0.017; p: 0.066)  |
|                     | age*symptomatic_maybe  | n.a.                           | n.a.                           | -0.007 (s.e.: 0.015; p: 0.635) |
| log(Neutralization) | intercept              | 4.832 (s.e.: 0.109; p<0.001)   | 4.943 (s.e.: 0.123; p<0.001)   | 4.593 (s.e.: 0.201; p<0.001)   |
|                     | timeFU1                | -0.388 (s.e.: 0.107; p<0.001)  | -0.446 (s.e.: 0.121; p<0.001)  | -0.446 (s.e.: 0.121; p<0.001)  |
|                     | timeFU2                | -0.621 (s.e.: 0.107; p<0.001)  | -0.594 (s.e.: 0.123; p<0.001)  | -0.593 (s.e.: 0.123; p<0.001)  |
|                     | age                    | 0.02 (s.e.: 0.004; p<0.001)    | 0.02 (s.e.: 0.004; p<0.001)    | 0.02 (s.e.: 0.009; p: 0.035)   |
|                     | sex                    | -0.008 (s.e.: 0.149; p: 0.959) | -0.026 (s.e.: 0.148; p: 0.861) | 0 (s.e.: 0.148; p: 1)          |
|                     | smoker_current         | n.a.                           | -0.55 (s.e.: 0.249; p: 0.028)  | -0.529 (s.e.: 0.249; p: 0.034) |
|                     | smoker_ex              | n.a.                           | -0.212 (s.e.: 0.176; p: 0.227) | -0.181 (s.e.: 0.176; p: 0.304) |
|                     | symptomatic_yes        | n.a.                           | n.a.                           | 0.414 (s.e.: 0.211; p: 0.05)   |
|                     | symptomatic_maybe      | n.a.                           | n.a.                           | 0.351 (s.e.: 0.183; p: 0.055)  |
|                     | age*timeFU1            | -0.005 (s.e.: 0.004; p: 0.198) | -0.005 (s.e.: 0.004; p: 0.216) | -0.005 (s.e.: 0.004; p: 0.217) |

Supplementary Material: Population-based study of the durability of humoral immunity after SARS-CoV-2 infection

| outcome        | beta estimates         | base                           | smoking                        | symptomatic                    |
|----------------|------------------------|--------------------------------|--------------------------------|--------------------------------|
|                | age*timeFU2            | 0.002 (s.e.: 0.004; p: 0.65)   | 0.002 (s.e.: 0.004; p: 0.617)  | 0.002 (s.e.: 0.004; p: 0.608)  |
|                | sex*timeFU1            | 0.024 (s.e.: 0.146; p: 0.872)  | 0.034 (s.e.: 0.146; p: 0.813)  | 0.034 (s.e.: 0.146; p: 0.817)  |
|                | sex*timeFU2            | 0.262 (s.e.: 0.146; p: 0.074)  | 0.243 (s.e.: 0.147; p: 0.1)    | 0.239 (s.e.: 0.147; p: 0.106)  |
|                | smoker_current*timeFU1 | n.a.                           | 0.286 (s.e.: 0.263; p: 0.277)  | 0.284 (s.e.: 0.263; p: 0.281)  |
|                | smoker_current*timeFU2 | n.a.                           | -0.009 (s.e.: 0.258; p: 0.974) | -0.003 (s.e.: 0.258; p: 0.989) |
|                | smoker_ex*timeFU1      | n.a.                           | 0.11 (s.e.: 0.177; p: 0.535)   | 0.108 (s.e.: 0.177; p: 0.543)  |
|                | smoker_ex*timeFU2      | n.a.                           | -0.04 (s.e.: 0.179; p: 0.824)  | -0.044 (s.e.: 0.179; p: 0.804) |
|                | age*symptomatic_yes    | n.a.                           | n.a.                           | 0.014 (s.e.: 0.012; p: 0.236)  |
|                | age*symptomatic_maybe  | n.a.                           | n.a.                           | -0.004 (s.e.: 0.01; p: 0.693)  |
| log(N NTD IgG) | intercept              | -0.54 (s.e.: 0.085; p<0.001)   | -0.469 (s.e.: 0.094; p<0.001)  | -0.767 (s.e.: 0.168; p<0.001)  |
|                | timeFU1                | -0.674 (s.e.: 0.043; p<0.001)  | -0.707 (s.e.: 0.05; p<0.001)   | -0.706 (s.e.: 0.05; p<0.001)   |
|                | timeFU2                | -1.066 (s.e.: 0.043; p<0.001)  | -1.085 (s.e.: 0.05; p<0.001)   | -1.085 (s.e.: 0.05; p<0.001)   |
|                | age                    | 0.015 (s.e.: 0.003; p<0.001)   | 0.015 (s.e.: 0.003; p<0.001)   | 0.01 (s.e.: 0.008; p: 0.23)    |
|                | sex                    | -0.033 (s.e.: 0.115; p: 0.773) | -0.046 (s.e.: 0.115; p: 0.687) | -0.018 (s.e.: 0.115; p: 0.877) |
|                | smoker_current         | n.a.                           | -0.264 (s.e.: 0.151; p: 0.082) | -0.256 (s.e.: 0.152; p: 0.092) |
|                | smoker_ex              | n.a.                           | -0.161 (s.e.: 0.118; p: 0.172) | -0.148 (s.e.: 0.119; p: 0.214) |
|                | symptomatic_yes        | n.a.                           | n.a.                           | 0.353 (s.e.: 0.187; p: 0.06)   |
|                | symptomatic_maybe      | n.a.                           | n.a.                           | 0.299 (s.e.: 0.162; p: 0.065)  |
|                | age*timeFU1            | 0 (s.e.: 0.002; p: 0.824)      | -0.001 (s.e.: 0.002; p: 0.715) | -0.001 (s.e.: 0.002; p: 0.716) |
|                | age*timeFU2            | -0.002 (s.e.: 0.002; p: 0.244) | -0.002 (s.e.: 0.002; p: 0.211) | -0.002 (s.e.: 0.002; p: 0.215) |
|                | sex*timeFU1            | 0.148 (s.e.: 0.058; p: 0.011)  | 0.157 (s.e.: 0.059; p: 0.008)  | 0.157 (s.e.: 0.059; p: 0.008)  |
|                | sex*timeFU2            | 0.242 (s.e.: 0.058; p<0.001)   | 0.246 (s.e.: 0.059; p<0.001)   | 0.246 (s.e.: 0.059; p<0.001)   |
|                | smoker_current*timeFU1 | n.a.                           | 0.07 (s.e.: 0.107; p: 0.515)   | 0.069 (s.e.: 0.107; p: 0.522)  |
|                | smoker_current*timeFU2 | n.a.                           | 0.075 (s.e.: 0.104; p: 0.472)  | 0.075 (s.e.: 0.104; p: 0.467)  |
|                | smoker_ex*timeFU1      | n.a.                           | 0.091 (s.e.: 0.072; p: 0.209)  | 0.09 (s.e.: 0.072; p: 0.214)   |
|                | smoker_ex*timeFU2      | n.a.                           | 0.059 (s.e.: 0.073; p: 0.422)  | 0.057 (s.e.: 0.073; p: 0.435)  |
|                | age*symptomatic_yes    | n.a.                           | n.a.                           | 0.019 (s.e.: 0.011; p: 0.077)  |
|                | age*symptomatic_maybe  | n.a.                           | n.a.                           | 0.002 (s.e.: 0.009; p: 0.792)  |
| log(N CTD IgG) | intercept              | -0.639 (s.e.: 0.069; p<0.001)  | -0.6 (s.e.: 0.077; p<0.001)    | -0.873 (s.e.: 0.135; p<0.001)  |
|                | timeFU1                | -0.507 (s.e.: 0.039; p<0.001)  | -0.558 (s.e.: 0.045; p<0.001)  | -0.557 (s.e.: 0.045; p<0.001)  |
|                | timeFU2                | -0.935 (s.e.: 0.039; p<0.001)  | -0.992 (s.e.: 0.045; p<0.001)  | -0.991 (s.e.: 0.045; p<0.001)  |
|                | age                    | 0.01 (s.e.: 0.003; p<0.001)    | 0.011 (s.e.: 0.003; p<0.001)   | 0.003 (s.e.: 0.006; p: 0.623)  |
|                | sex                    | -0.05 (s.e.: 0.094; p: 0.592)  | -0.06 (s.e.: 0.094; p: 0.522)  | -0.034 (s.e.: 0.093; p: 0.712) |
|                | smoker_current         | n.a.                           | -0.167 (s.e.: 0.129; p: 0.199) | -0.157 (s.e.: 0.129; p: 0.225) |
|                | smoker_ex              | n.a.                           | -0.081 (s.e.: 0.099; p: 0.417) | -0.068 (s.e.: 0.099; p: 0.491) |
|                | symptomatic_yes        | n.a.                           | n.a.                           | 0.424 (s.e.: 0.149; p: 0.005)  |

Supplementary Material: Population-based study of the durability of humoral immunity after SARS-CoV-2 infection

| outcome           | beta estimates         | base                           | smoking                        | symptomatic                    |
|-------------------|------------------------|--------------------------------|--------------------------------|--------------------------------|
|                   | symptomatic_maybe      | n.a.                           | n.a.                           | 0.244 (s.e.: 0.129; p: 0.059)  |
|                   | age*timeFU1            | 0.001 (s.e.: 0.002; p: 0.585)  | 0 (s.e.: 0.002; p: 0.906)      | 0 (s.e.: 0.002; p: 0.905)      |
|                   | age*timeFU2            | 0.001 (s.e.: 0.002; p: 0.461)  | 0 (s.e.: 0.002; p: 0.862)      | 0 (s.e.: 0.002; p: 0.854)      |
|                   | sex*timeFU1            | 0.077 (s.e.: 0.053; p: 0.147)  | 0.088 (s.e.: 0.053; p: 0.101)  | 0.087 (s.e.: 0.053; p: 0.102)  |
|                   | sex*timeFU2            | 0.222 (s.e.: 0.053; p<0.001)   | 0.231 (s.e.: 0.054; p<0.001)   | 0.231 (s.e.: 0.054; p<0.001)   |
|                   | smoker_current*timeFU1 | n.a.                           | 0.071 (s.e.: 0.097; p: 0.466)  | 0.07 (s.e.: 0.097; p: 0.469)   |
|                   | smoker_current*timeFU2 | n.a.                           | 0.118 (s.e.: 0.094; p: 0.209)  | 0.119 (s.e.: 0.094; p: 0.204)  |
|                   | smoker_ex*timeFU1      | n.a.                           | 0.155 (s.e.: 0.065; p: 0.018)  | 0.154 (s.e.: 0.065; p: 0.019)  |
|                   | smoker_ex*timeFU2      | n.a.                           | 0.172 (s.e.: 0.066; p: 0.01)   | 0.17 (s.e.: 0.066; p: 0.01)    |
|                   | age*symptomatic_yes    | n.a.                           | n.a.                           | 0.017 (s.e.: 0.008; p: 0.038)  |
|                   | age*symptomatic_maybe  | n.a.                           | n.a.                           | 0.005 (s.e.: 0.007; p: 0.444)  |
| log(N NTD IgG AI) | intercept              | -0.853 (s.e.: 0.045; p<0.001)  | -0.836 (s.e.: 0.051; p<0.001)  | -0.883 (s.e.: 0.089; p<0.001)  |
|                   | timeFU1                | -0.049 (s.e.: 0.032; p: 0.123) | -0.059 (s.e.: 0.036; p: 0.104) | -0.058 (s.e.: 0.036; p: 0.109) |
|                   | timeFU2                | -0.162 (s.e.: 0.032; p<0.001)  | -0.173 (s.e.: 0.036; p<0.001)  | -0.172 (s.e.: 0.036; p<0.001)  |
|                   | age                    | 0.004 (s.e.: 0.002; p: 0.012)  | 0.005 (s.e.: 0.002; p: 0.012)  | 0.007 (s.e.: 0.004; p: 0.098)  |
|                   | sex                    | -0.043 (s.e.: 0.061; p: 0.482) | -0.047 (s.e.: 0.062; p: 0.447) | -0.037 (s.e.: 0.062; p: 0.544) |
|                   | smoker_current         | n.a.                           | -0.067 (s.e.: 0.093; p: 0.471) | -0.067 (s.e.: 0.093; p: 0.472) |
|                   | smoker_ex              | n.a.                           | -0.035 (s.e.: 0.068; p: 0.614) | -0.034 (s.e.: 0.069; p: 0.617) |
|                   | symptomatic_yes        | n.a.                           | n.a.                           | 0.118 (s.e.: 0.097; p: 0.222)  |
|                   | symptomatic_maybe      | n.a.                           | n.a.                           | 0.013 (s.e.: 0.083; p: 0.875)  |
|                   | age*timeFU1            | 0 (s.e.: 0.001; p: 0.918)      | 0 (s.e.: 0.001; p: 0.944)      | 0 (s.e.: 0.001; p: 0.938)      |
|                   | age*timeFU2            | -0.002 (s.e.: 0.001; p: 0.05)  | -0.002 (s.e.: 0.001; p: 0.075) | -0.002 (s.e.: 0.001; p: 0.078) |
|                   | sex*timeFU1            | 0.015 (s.e.: 0.042; p: 0.717)  | 0.018 (s.e.: 0.043; p: 0.668)  | 0.018 (s.e.: 0.043; p: 0.675)  |
|                   | sex*timeFU2            | 0.108 (s.e.: 0.042; p: 0.011)  | 0.117 (s.e.: 0.043; p: 0.007)  | 0.116 (s.e.: 0.043; p: 0.007)  |
|                   | smoker_current*timeFU1 | n.a.                           | 0.033 (s.e.: 0.077; p: 0.67)   | 0.032 (s.e.: 0.077; p: 0.674)  |
|                   | smoker_current*timeFU2 | n.a.                           | 0.096 (s.e.: 0.075; p: 0.199)  | 0.096 (s.e.: 0.075; p: 0.198)  |
|                   | smoker_ex*timeFU1      | n.a.                           | 0.021 (s.e.: 0.051; p: 0.678)  | 0.02 (s.e.: 0.051; p: 0.691)   |
|                   | smoker_ex*timeFU2      | n.a.                           | -0.002 (s.e.: 0.052; p: 0.971) | -0.003 (s.e.: 0.052; p: 0.955) |
|                   | age*symptomatic_yes    | n.a.                           | n.a.                           | 0.004 (s.e.: 0.005; p: 0.51)   |
|                   | age*symptomatic_maybe  | n.a.                           | n.a.                           | -0.005 (s.e.: 0.005; p: 0.248) |
| log(N CTD IgG AI) | intercept              | -1.143 (s.e.: 0.037; p<0.001)  | -1.173 (s.e.: 0.042; p<0.001)  | -1.147 (s.e.: 0.071; p<0.001)  |
|                   | timeFU1                | 0.045 (s.e.: 0.031; p: 0.148)  | 0.054 (s.e.: 0.036; p: 0.13)   | 0.054 (s.e.: 0.036; p: 0.131)  |
|                   | timeFU2                | 0.095 (s.e.: 0.031; p: 0.003)  | 0.136 (s.e.: 0.036; p<0.001)   | 0.136 (s.e.: 0.036; p<0.001)   |
|                   | age                    | 0.001 (s.e.: 0.001; p: 0.319)  | 0.001 (s.e.: 0.001; p: 0.332)  | 0.001 (s.e.: 0.003; p: 0.706)  |
|                   | sex                    | -0.005 (s.e.: 0.05; p: 0.924)  | 0.002 (s.e.: 0.05; p: 0.972)   | -0.001 (s.e.: 0.051; p: 0.987) |

Supplementary Material: Population-based study of the durability of humoral immunity after SARS-CoV-2 infection

| outcome           | beta estimates         | base                           | smoking                        | symptomatic                    |
|-------------------|------------------------|--------------------------------|--------------------------------|--------------------------------|
|                   | smoker_current         | n.a.                           | 0.165 (s.e.: 0.08; p: 0.04)    | 0.165 (s.e.: 0.081; p: 0.042)  |
|                   | smoker_ex              | n.a.                           | 0.044 (s.e.: 0.058; p: 0.448)  | 0.042 (s.e.: 0.059; p: 0.473)  |
|                   | symptomatic_yes        | n.a.                           | n.a.                           | -0.024 (s.e.: 0.076; p: 0.75)  |
|                   | symptomatic_maybe      | n.a.                           | n.a.                           | -0.026 (s.e.: 0.065; p: 0.69)  |
|                   | age*timeFU1            | 0 (s.e.: 0.001; p: 0.792)      | 0 (s.e.: 0.001; p: 0.897)      | 0 (s.e.: 0.001; p: 0.9)        |
|                   | age*timeFU2            | -0.001 (s.e.: 0.001; p: 0.433) | 0 (s.e.: 0.001; p: 0.77)       | 0 (s.e.: 0.001; p: 0.763)      |
|                   | sex*timeFU1            | 0.008 (s.e.: 0.042; p: 0.845)  | 0.004 (s.e.: 0.042; p: 0.926)  | 0.004 (s.e.: 0.042; p: 0.923)  |
|                   | sex*timeFU2            | -0.02 (s.e.: 0.042; p: 0.644)  | -0.022 (s.e.: 0.042; p: 0.609) | -0.021 (s.e.: 0.042; p: 0.613) |
|                   | smoker_current*timeFU1 | n.a.                           | -0.07 (s.e.: 0.076; p: 0.357)  | -0.07 (s.e.: 0.076; p: 0.359)  |
|                   | smoker_current*timeFU2 | n.a.                           | -0.069 (s.e.: 0.073; p: 0.349) | -0.069 (s.e.: 0.073; p: 0.346) |
|                   | smoker_ex*timeFU1      | n.a.                           | -0.001 (s.e.: 0.051; p: 0.981) | -0.001 (s.e.: 0.051; p: 0.985) |
|                   | smoker_ex*timeFU2      | n.a.                           | -0.138 (s.e.: 0.051; p: 0.008) | -0.137 (s.e.: 0.051; p: 0.008) |
|                   | age*symptomatic_yes    | n.a.                           | n.a.                           | -0.001 (s.e.: 0.004; p: 0.753) |
|                   | age*symptomatic_maybe  | n.a.                           | n.a.                           | 0.001 (s.e.: 0.004; p: 0.84)   |
| log(S RBD IgG AI) | intercept              | -1.22 (s.e.: 0.048; p<0.001)   | -1.198 (s.e.: 0.054; p<0.001)  | -1.15 (s.e.: 0.094; p<0.001)   |
|                   | timeFU1                | 0.228 (s.e.: 0.029; p<0.001)   | 0.249 (s.e.: 0.033; p<0.001)   | 0.25 (s.e.: 0.033; p<0.001)    |
|                   | timeFU2                | 0.36 (s.e.: 0.029; p<0.001)    | 0.357 (s.e.: 0.033; p<0.001)   | 0.357 (s.e.: 0.033; p<0.001)   |
|                   | age                    | 0.005 (s.e.: 0.002; p: 0.009)  | 0.005 (s.e.: 0.002; p: 0.008)  | 0.006 (s.e.: 0.004; p: 0.154)  |
|                   | sex                    | -0.06 (s.e.: 0.066; p: 0.364)  | -0.062 (s.e.: 0.066; p: 0.344) | -0.045 (s.e.: 0.064; p: 0.49)  |
|                   | smoker_current         | n.a.                           | -0.073 (s.e.: 0.093; p: 0.433) | -0.095 (s.e.: 0.093; p: 0.306) |
|                   | smoker_ex              | n.a.                           | -0.055 (s.e.: 0.071; p: 0.435) | -0.075 (s.e.: 0.07; p: 0.287)  |
|                   | symptomatic_yes        | n.a.                           | n.a.                           | 0.046 (s.e.: 0.103; p: 0.659)  |
|                   | symptomatic_maybe      | n.a.                           | n.a.                           | -0.115 (s.e.: 0.089; p: 0.195) |
|                   | age*timeFU1            | -0.003 (s.e.: 0.001; p: 0.016) | -0.002 (s.e.: 0.001; p: 0.04)  | -0.002 (s.e.: 0.001; p: 0.041) |
|                   | age*timeFU2            | -0.003 (s.e.: 0.001; p: 0.002) | -0.004 (s.e.: 0.001; p: 0.002) | -0.004 (s.e.: 0.001; p: 0.003) |
|                   | sex*timeFU1            | 0.085 (s.e.: 0.039; p: 0.03)   | 0.083 (s.e.: 0.04; p: 0.036)   | 0.084 (s.e.: 0.04; p: 0.034)   |
|                   | sex*timeFU2            | 0.036 (s.e.: 0.039; p: 0.363)  | 0.031 (s.e.: 0.04; p: 0.434)   | 0.031 (s.e.: 0.04; p: 0.435)   |
|                   | smoker_current*timeFU1 | n.a.                           | -0.052 (s.e.: 0.072; p: 0.467) | -0.052 (s.e.: 0.072; p: 0.469) |
|                   | smoker_current*timeFU2 | n.a.                           | -0.009 (s.e.: 0.07; p: 0.894)  | -0.009 (s.e.: 0.07; p: 0.9)    |
|                   | smoker_ex*timeFU1      | n.a.                           | -0.059 (s.e.: 0.049; p: 0.225) | -0.06 (s.e.: 0.049; p: 0.219)  |
|                   | smoker_ex*timeFU2      | n.a.                           | 0.026 (s.e.: 0.049; p: 0.597)  | 0.026 (s.e.: 0.049; p: 0.602)  |
|                   | age*symptomatic_yes    | n.a.                           | n.a.                           | 0.01 (s.e.: 0.006; p: 0.094)   |
|                   | age*symptomatic_maybe  | n.a.                           | n.a.                           | -0.006 (s.e.: 0.005; p: 0.244) |
| log(S ecto IgG)   | intercept              | -0.042 (s.e.: 0.046; p: 0.354) | -0.005 (s.e.: 0.05; p: 0.926)  | -0.109 (s.e.: 0.089; p: 0.223) |
|                   | timeFU1                | -0.161 (s.e.: 0.024; p<0.001)  | -0.17 (s.e.: 0.027; p<0.001)   | -0.169 (s.e.: 0.027; p<0.001)  |
|                   | timeFU2                | -0.299 (s.e.: 0.024; p<0.001)  | -0.294 (s.e.: 0.028; p<0.001)  | -0.294 (s.e.: 0.028; p<0.001)  |

Supplementary Material: Population-based study of the durability of humoral immunity after SARS-CoV-2 infection

| outcome            | beta estimates         | base                           | smoking                        | symptomatic                    |
|--------------------|------------------------|--------------------------------|--------------------------------|--------------------------------|
|                    | age                    | 0.007 (s.e.: 0.002; p<0.001)   | 0.007 (s.e.: 0.002; p<0.001)   | 0.006 (s.e.: 0.004; p: 0.185)  |
|                    | sex                    | 0.011 (s.e.: 0.062; p: 0.861)  | 0.005 (s.e.: 0.062; p: 0.932)  | 0.02 (s.e.: 0.061; p: 0.749)   |
|                    | smoker_current         | n.a.                           | -0.243 (s.e.: 0.085; p: 0.004) | -0.241 (s.e.: 0.085; p: 0.005) |
|                    | smoker_ex              | n.a.                           | -0.061 (s.e.: 0.066; p: 0.354) | -0.061 (s.e.: 0.066; p: 0.357) |
|                    | symptomatic_yes        | n.a.                           | n.a.                           | 0.204 (s.e.: 0.098; p: 0.039)  |
|                    | symptomatic_maybe      | n.a.                           | n.a.                           | 0.07 (s.e.: 0.085; p: 0.413)   |
|                    | age*timeFU1            | 0.001 (s.e.: 0.001; p: 0.552)  | 0.001 (s.e.: 0.001; p: 0.473)  | 0.001 (s.e.: 0.001; p: 0.482)  |
|                    | age*timeFU2            | -0.001 (s.e.: 0.001; p: 0.569) | -0.001 (s.e.: 0.001; p: 0.375) | -0.001 (s.e.: 0.001; p: 0.373) |
|                    | sex*timeFU1            | 0.047 (s.e.: 0.033; p: 0.163)  | 0.048 (s.e.: 0.033; p: 0.143)  | 0.048 (s.e.: 0.033; p: 0.144)  |
|                    | sex*timeFU2            | 0.123 (s.e.: 0.033; p<0.001)   | 0.111 (s.e.: 0.033; p: 0.001)  | 0.111 (s.e.: 0.033; p: 0.001)  |
|                    | smoker_current*timeFU1 | n.a.                           | -0.009 (s.e.: 0.062; p: 0.885) | -0.009 (s.e.: 0.062; p: 0.882) |
|                    | smoker_current*timeFU2 | n.a.                           | -0.085 (s.e.: 0.059; p: 0.151) | -0.085 (s.e.: 0.059; p: 0.152) |
|                    | smoker_ex*timeFU1      | n.a.                           | 0.031 (s.e.: 0.04; p: 0.444)   | 0.03 (s.e.: 0.04; p: 0.448)    |
|                    | smoker_ex*timeFU2      | n.a.                           | 0.051 (s.e.: 0.041; p: 0.212)  | 0.05 (s.e.: 0.041; p: 0.217)   |
|                    | age*symptomatic_yes    | n.a.                           | n.a.                           | 0.009 (s.e.: 0.006; p: 0.121)  |
|                    | age*symptomatic_maybe  | n.a.                           | n.a.                           | -0.002 (s.e.: 0.005; p: 0.738) |
| log(S ecto IgG AI) | intercept              | -0.974 (s.e.: 0.048; p<0.001)  | -0.945 (s.e.: 0.053; p<0.001)  | -0.958 (s.e.: 0.094; p<0.001)  |
|                    | timeFU1                | 0.193 (s.e.: 0.025; p<0.001)   | 0.189 (s.e.: 0.029; p<0.001)   | 0.189 (s.e.: 0.029; p<0.001)   |
|                    | timeFU2                | 0.259 (s.e.: 0.025; p<0.001)   | 0.25 (s.e.: 0.029; p<0.001)    | 0.25 (s.e.: 0.029; p<0.001)    |
|                    | age                    | 0.004 (s.e.: 0.002; p: 0.023)  | 0.004 (s.e.: 0.002; p: 0.028)  | 0.004 (s.e.: 0.004; p: 0.315)  |
|                    | sex                    | -0.072 (s.e.: 0.065; p: 0.269) | -0.079 (s.e.: 0.064; p: 0.219) | -0.065 (s.e.: 0.064; p: 0.311) |
|                    | smoker_current         | n.a.                           | -0.237 (s.e.: 0.088; p: 0.007) | -0.249 (s.e.: 0.088; p: 0.005) |
|                    | smoker_ex              | n.a.                           | -0.028 (s.e.: 0.069; p: 0.688) | -0.04 (s.e.: 0.069; p: 0.56)   |
|                    | symptomatic_yes        | n.a.                           | n.a.                           | 0.094 (s.e.: 0.103; p: 0.364)  |
|                    | symptomatic_maybe      | n.a.                           | n.a.                           | -0.032 (s.e.: 0.089; p: 0.718) |
|                    | age*timeFU1            | 0 (s.e.: 0.001; p: 0.844)      | 0 (s.e.: 0.001; p: 0.952)      | 0 (s.e.: 0.001; p: 0.94)       |
|                    | age*timeFU2            | -0.001 (s.e.: 0.001; p: 0.213) | -0.001 (s.e.: 0.001; p: 0.176) | -0.001 (s.e.: 0.001; p: 0.174) |
|                    | sex*timeFU1            | 0.105 (s.e.: 0.034; p: 0.002)  | 0.109 (s.e.: 0.034; p: 0.002)  | 0.109 (s.e.: 0.034; p: 0.002)  |
|                    | sex*timeFU2            | 0.08 (s.e.: 0.034; p: 0.019)   | 0.074 (s.e.: 0.034; p: 0.032)  | 0.074 (s.e.: 0.034; p: 0.033)  |
|                    | smoker_current*timeFU1 | n.a.                           | -0.033 (s.e.: 0.064; p: 0.608) | -0.033 (s.e.: 0.064; p: 0.607) |
|                    | smoker_current*timeFU2 | n.a.                           | 0.015 (s.e.: 0.061; p: 0.813)  | 0.015 (s.e.: 0.061; p: 0.81)   |
|                    | smoker_ex*timeFU1      | n.a.                           | 0.018 (s.e.: 0.042; p: 0.664)  | 0.018 (s.e.: 0.042; p: 0.673)  |
|                    | smoker_ex*timeFU2      | n.a.                           | 0.057 (s.e.: 0.042; p: 0.176)  | 0.057 (s.e.: 0.042; p: 0.179)  |
|                    | age*symptomatic_yes    | n.a.                           | n.a.                           | 0.009 (s.e.: 0.006; p: 0.142)  |
|                    | age*symptomatic_maybe  | n.a.                           | n.a.                           | -0.004 (s.e.: 0.005; p: 0.447) |

**Supplementary Table 5: Association of symptomology and its interaction with age on eight antibody and avidity levels using linear mixed models.** This table shows results from eight linear mixed models (LMMs), one for each of the following eight antibody and avidity levels as outcome: S RBD ELISA IgA, S RBD ELISA IgM, N NTD ELISA IgG, N CTD ELISA IgG, N NTD IgG AI, N CTD IgG AI, S ecto ELISA IgG, and S ecto ELISA IgG AI (ln-transformed to ensure approximate normal distribution). These results are based on an extension of the main model (see Table 3) by adding 2 symptomology variables (symptomatic\_yes=symptomatic at the time of infection ascertained by positive PCR test, symptomatic\_maybe=reported symptoms during the time period without ascertainment of specific time of infection by PCR test, with asymptomatic as reference meaning no symptoms during the time period until BL) and their age-interaction. This table shows covariate estimates, standard errors (s.e.) and P-values for the associations of the symptomology variables with outcomes (1<sup>st</sup> column) and their interaction with age (2<sup>nd</sup> column; age centered at 50 years). The analogous results for the other 5 levels are shown in Table 4.

|                      | <b>Association with level<br/>coefficient (s.e.); P</b> | <b>Interaction with age<br/>coefficient (s.e.); P</b> |
|----------------------|---------------------------------------------------------|-------------------------------------------------------|
| <b>S RBD IgA</b>     |                                                         |                                                       |
| age                  | 0.007 (s.e.: 0.008; p: 0.371)                           | -                                                     |
| symptomatic_yes      | 0.371 (s.e.: 0.184; p: 0.044)                           | 0.021 (s.e.: 0.01; p: 0.043)                          |
| symptomatic_maybe    | 0.277 (s.e.: 0.159; p: 0.082)                           | 0.013 (s.e.: 0.009; p: 0.126)                         |
| <b>S RBD IgM</b>     |                                                         |                                                       |
| age                  | -0.01 (s.e.: 0.008; p: 0.223)                           | -                                                     |
| symptomatic_yes      | 0.126 (s.e.: 0.194; p: 0.514)                           | 0.02 (s.e.: 0.011; p: 0.062)                          |
| symptomatic_maybe    | 0.262 (s.e.: 0.167; p: 0.117)                           | 0.024 (s.e.: 0.009; p: 0.011)                         |
| <b>N NTD IgG</b>     |                                                         |                                                       |
| age                  | 0.01 (s.e.: 0.008; p: 0.23)                             | -                                                     |
| symptomatic_yes      | 0.353 (s.e.: 0.187; p: 0.06)                            | 0.019 (s.e.: 0.011; p: 0.077)                         |
| symptomatic_maybe    | 0.299 (s.e.: 0.162; p: 0.065)                           | 0.002 (s.e.: 0.009; p: 0.792)                         |
| <b>N CTD IgG</b>     |                                                         |                                                       |
| age                  | 0.003 (s.e.: 0.006; p: 0.623)                           | -                                                     |
| symptomatic_yes      | 0.424 (s.e.: 0.149; p: 0.005)                           | 0.017 (s.e.: 0.008; p: 0.038)                         |
| symptomatic_maybe    | 0.244 (s.e.: 0.129; p: 0.059)                           | 0.005 (s.e.: 0.007; p: 0.444)                         |
| <b>N NTD IgG AI</b>  |                                                         |                                                       |
| age                  | 0.007 (s.e.: 0.004; p: 0.098)                           | -                                                     |
| symptomatic_yes      | 0.118 (s.e.: 0.097; p: 0.222)                           | 0.004 (s.e.: 0.005; p: 0.51)                          |
| symptomatic_maybe    | 0.013 (s.e.: 0.083; p: 0.875)                           | -0.005 (s.e.: 0.005; p: 0.248)                        |
| <b>N CTD IgG AI</b>  |                                                         |                                                       |
| age                  | 0.001 (s.e.: 0.003; p: 0.706)                           | -                                                     |
| symptomatic_yes      | -0.024 (s.e.: 0.076; p: 0.75)                           | -0.001 (s.e.: 0.004; p: 0.753)                        |
| symptomatic_maybe    | -0.026 (s.e.: 0.065; p: 0.69)                           | 0.001 (s.e.: 0.004; p: 0.84)                          |
| <b>S ecto IgG</b>    |                                                         |                                                       |
| age                  | 0.006 (s.e.: 0.004; p: 0.185)                           | -                                                     |
| symptomatic_yes      | 0.204 (s.e.: 0.098; p: 0.039)                           | 0.009 (s.e.: 0.006; p: 0.121)                         |
| symptomatic_maybe    | 0.07 (s.e.: 0.085; p: 0.413)                            | -0.002 (s.e.: 0.005; p: 0.738)                        |
| <b>S ecto IgG AI</b> |                                                         |                                                       |
| age                  | 0.004 (s.e.: 0.004; p: 0.315)                           | -                                                     |
| symptomatic_yes      | 0.094 (s.e.: 0.103; p: 0.364)                           | 0.009 (s.e.: 0.006; p: 0.142)                         |
| symptomatic_maybe    | -0.032 (s.e.: 0.089; p: 0.718)                          | -0.004 (s.e.: 0.005; p: 0.447)                        |
